# Supplementary material for: Weak sensitivity of the terrestrial water budget to global soil texture maps in the ORCHIDEE land surface model
Source: Copernicus journal article supplement (doi:10.5194/hess-24-3753-2020), 2020-07-24
Supplement: Supplementary file 1 [file hess-24-3753-2020-supplement.pdf]

Supplement of Hydrol. Earth Syst. Sci., 24, 3753–3774, 2020  
<https://doi.org/10.5194/hess-24-3753-2020-supplement>  
© Author(s) 2020. This work is distributed under  
the Creative Commons Attribution 4.0 License.

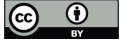

*Supplement of*

## **Weak sensitivity of the terrestrial water budget to global soil texture maps in the ORCHIDEE land surface model**

**Salma Tafasca et al.**

*Correspondence to:* Salma Tafasca ([salma.tafasca@upmc.fr](mailto:salma.tafasca@upmc.fr))

The copyright of individual parts of the supplement might differ from the CC BY 4.0 License.

## Supplement

### Text S1: Soil texture classes characteristics

Figure S1 presents the soil hydraulic parameters used in ORCHIDEE LSM:  $K_s$ ,  $\alpha$  (inverse of air entry suction, corresponding to the capillary forces close to saturation, at the top of the capillary fringe),  $n$  (Van Genuchten scale parameter),  $\theta_r$  and  $\theta_s$ . Their values for each USDA texture class are taken in Carsel and Parrish (1988). Water contents corresponding to the wilting point and the field capacity, noted  $\theta_w$  and  $\theta_{fc}$ , are derived from the Van Genuchten water retention curve:  $\theta_w$  is the water content corresponding to a water potential of -150m, and  $\theta_{fc}$  corresponds to a potential of -3.3 m except for the texture sand which corresponds to -1m.  $AWC$  is the available water capacity of the 2-meter soil column, it is calculated in mm as  $AWC(2m) = 2000 (\theta_{fc} - \theta_w)$ .

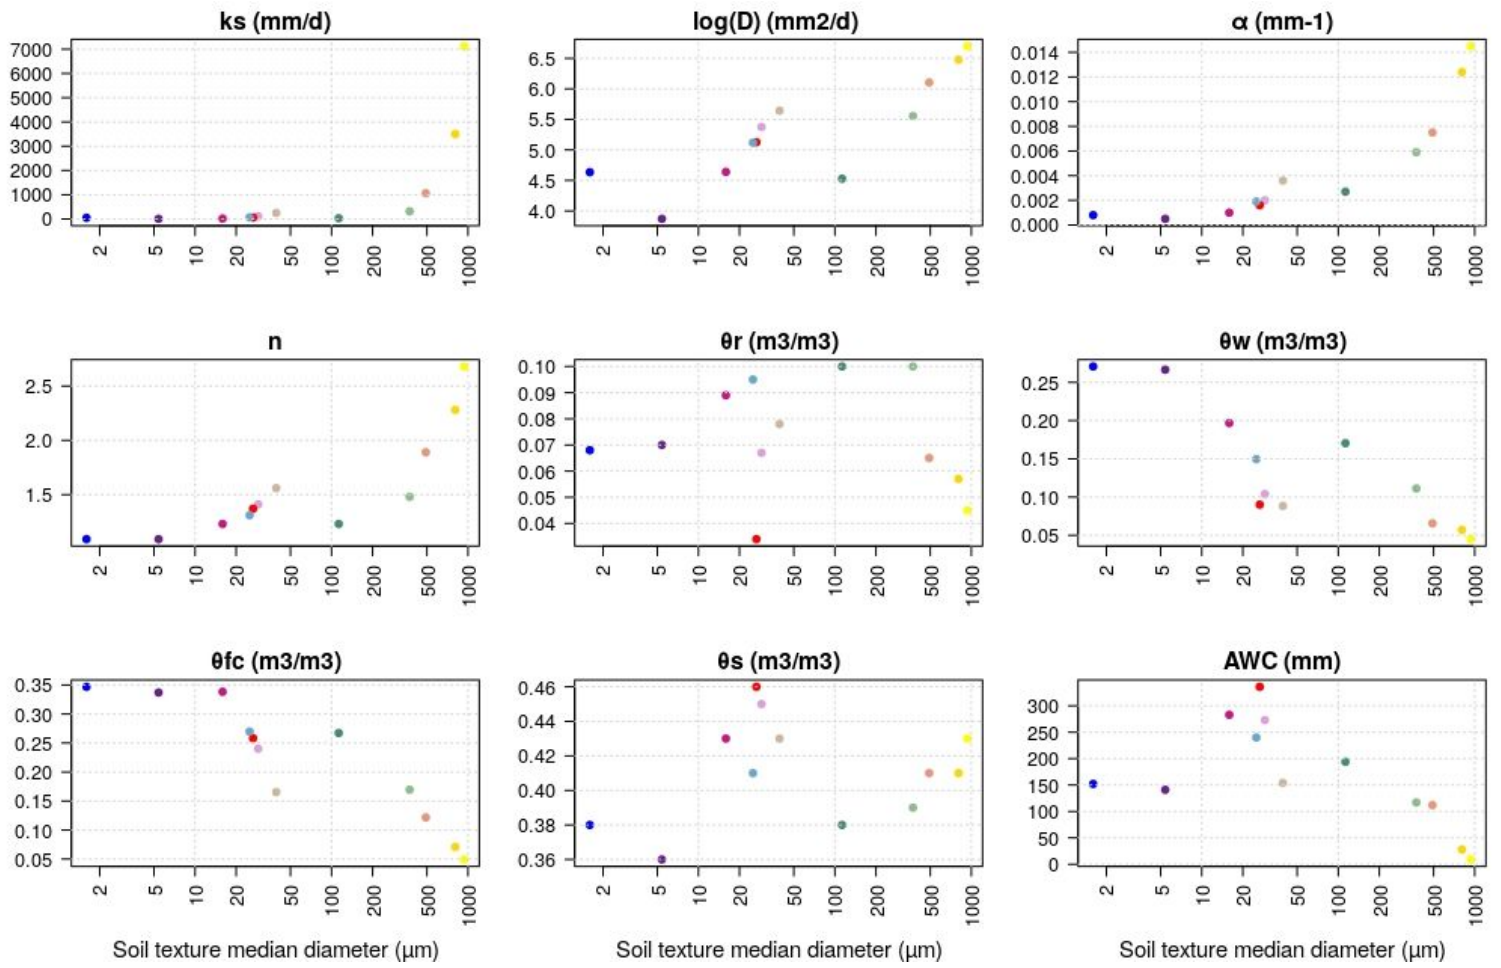

**Figure S1.** Soil parameters of the 12 USDA texture classes, for color codes see Figure 1.

D: maximum hydraulic diffusivity,  $\alpha$ : inverse of air entry suction, n: Van Genuchten parameter,  $\theta_r$ : residual water content,  $\theta_w$ : wilting point,  $\theta_{fc}$ : field capacity,  $\theta_s$ : saturated water content, AWC: available water content.

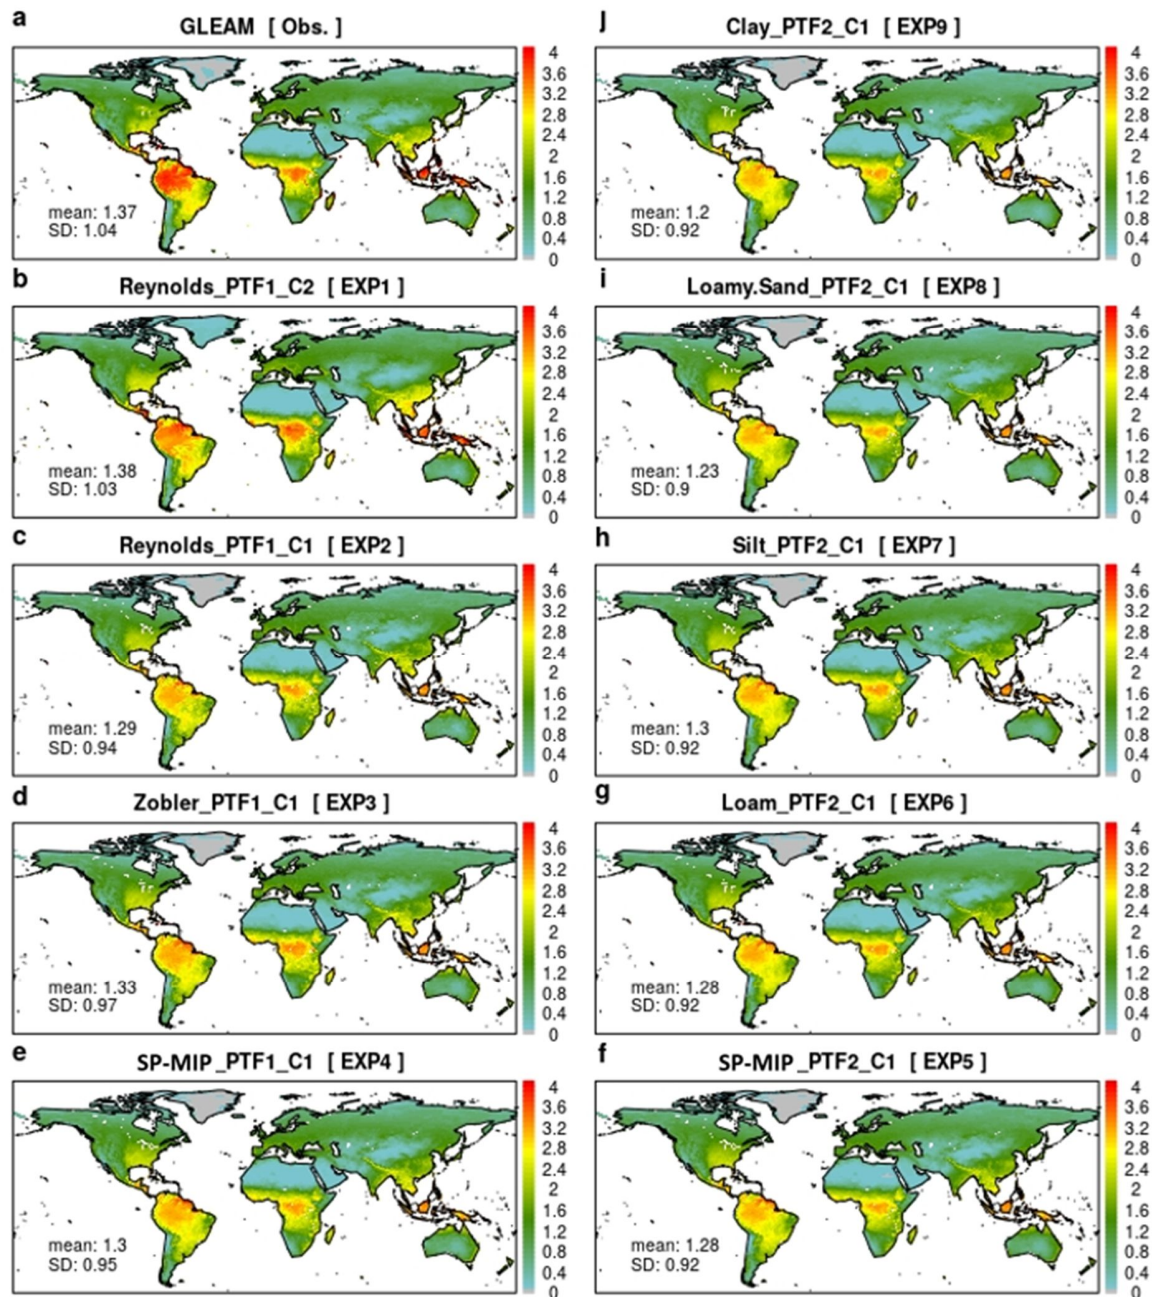

**Figure S2.** Maps of evapotranspiration averaged over 1980-2010 (a) estimated by Martens et al. (2017) and (b-j) for the nine experiments. **PTF1** is the default PTF in ORCHIDEE found in Carsel and Parrish (1988), **PTF2** is the PTF of Schaap et al. (2001), **C1** is the climate forcing GSWP3, **C2** is the climate forcing CRU-NCEP.

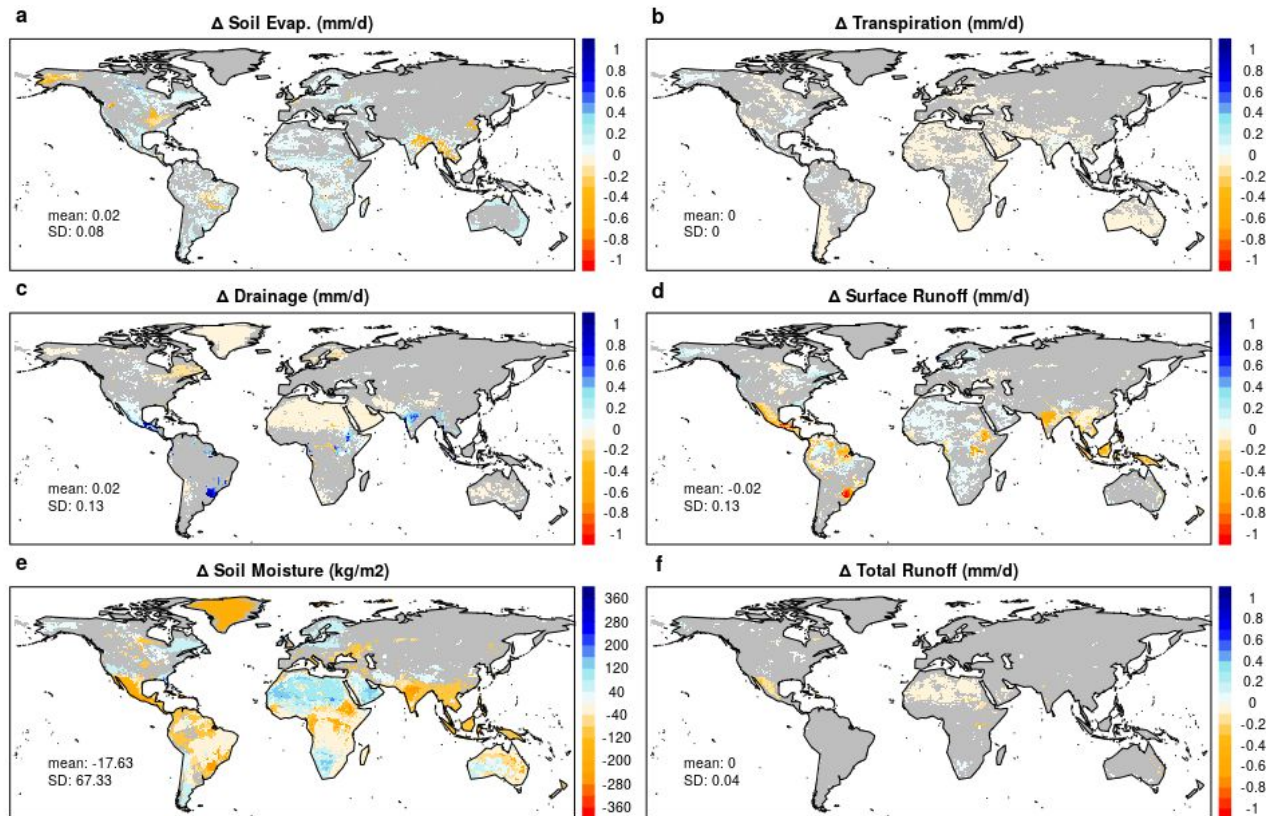

**Figure S3.** Difference in simulated variables when the SP-MIP map is replaced by a uniform Loamy map (EXP6 - EXP5), averaged over the period 1980-2010. The corresponding difference for evapotranspiration is shown in Fig. 5a. Grey color indicates that the difference is not statistically significant based on Student's t-test (with a p-value < 0.05%). Mean and standard deviation are averaged over the globe excluding Antarctica.

## Global Soil Regions

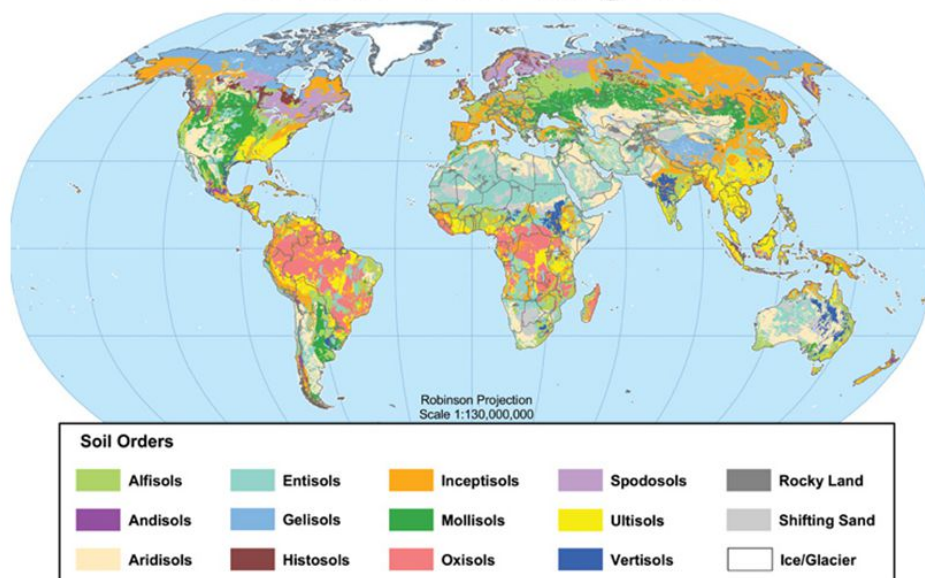

**Figure S4.** FAO Soil Order Map. This map is a simplification of the FAO/UNESCO Soil Map of the World (Eswaran et al., 2012), accessible on [https://www.nrcs.usda.gov/wps/portal/nrcs/detail/soils/use/?cid=nrcs142p2\\_054013](https://www.nrcs.usda.gov/wps/portal/nrcs/detail/soils/use/?cid=nrcs142p2_054013).
